# Supplementary material
Source: PubMed Central journal article supplement (PMC7344057)
Supplement: ajtr0012-2585-f7.pdf [file ajtr0012-2585-f7.pdf]

## CircMMP11 as a ce-circRNA in breast cancer

**Table S1.** Primers used for qRT-PCR

| Target           | Primer      | Sequence                                           |
|------------------|-------------|----------------------------------------------------|
| Hsa_circ_0062558 | F           | CTAGCTATGCCTACTTCTGCG                              |
|                  | R           | CCAGAGCCTTCACCTTACA                                |
| MMP11            | F           | GGAGAAGACGGACCTCACCTACAG                           |
|                  | R           | CAGTACCTGGCGAAGTCGATCATG                           |
| GPRIN1           | F           | CCCCTCCCCAACCTGCTTCTC                              |
|                  | R           | AGGACACAGGCTCTGGCTTCC                              |
| NR3C2            | F           | GCTGGAAGAAATGATTGCATCA                             |
|                  | R           | AACTTCTTTGACTTTGCTGCTC                             |
| SCL19A3          | F           | GGCCTACTACGCCTACATATAC                             |
|                  | R           | TGACGTTGAGGTAAGTACGA                               |
| 18S              | F           | GTAACCCGTTGAACCCATT                                |
|                  | R           | CCATCCAATCGGTAGTAGCG                               |
| GAPDH            | F           | CAGGAGGCATTGCTGATGAT                               |
|                  | R           | GAAGGCTGGGGCTCATTT                                 |
| Hsa-miR-661      | RT          | GTCGTATCCAGTGCAGGGTCCGAGGTATTCGCACTGGATACGACACGCGC |
|                  | F           | TGCCTGGGTCTCTGGCCT                                 |
| Hsa-miR-1204     | RT          | GTCGTATCCAGTGCAGGGTCCGAGGTATTCGCACTGGATACGACATAATG |
|                  | F           | GCGTCGTGGCCTGGTCTC                                 |
| Hsa-miR-1207     | RT          | GTCGTATCCAGTGCAGGGTCCGAGGTATTCGCACTGGATACGACCCCTC  |
|                  | F           | CGTGGCAGGGAGGCTGG                                  |
| Hsa-miR-4736     | RT          | GTCGTATCCAGTGCAGGGTCCGAGGTATTCGCACTGGATACGACCAGCCC |
|                  | F           | GCGCGAGGCAGTTATCT                                  |
| Hsa-miR-4763-3p  | RT          | GTCGTATCCAGTGCAGGGTCCGAGGTATTCGCACTGGATACGACCCCGCC |
|                  | F           | GCAGGGGCTGGTGCTG                                   |
| Hsa-miR-7150     | RT          | GTCGTATCCAGTGCAGGGTCCGAGGTATTCGCACTGGATACGACTACCTC |
|                  | F           | CGCGCTGGCAGGGGA                                    |
| miRNA            | Universal R | AGTGCAGGGTCCGAGGTATT                               |
| U6               | F           | CTCGCTTCGGCAGCACA                                  |
|                  | R           | AACGCTTCACGAATTTGCGT                               |

## CircMMP11 as a ce-circRNA in breast cancer

**Table S2.** Part of DE circRNAs and common DE genes as host genes in BC (fold change >  $\pm 10$ ,  $P < 0.05$ )

| circRNA_ID       | Fold change | <i>P</i> value | Best transcript | Host gene | Fold change | <i>P</i> value |
|------------------|-------------|----------------|-----------------|-----------|-------------|----------------|
| hsa_circ_0069094 | 103.613626  | 0.0024         | NM_005980       | S100P     | 68.69675    | 0.0021         |
| hsa_circ_0062558 | 23.567239   | 0.0007         | NM_005940       | MMP11     | 29.80927    | 0.0007         |
| hsa_circ_0074026 | 17.7777225  | 0.0065         | NM_002653       | PITX1     | 17.7219     | 0.0053         |
| hsa_circ_0074027 | 17.1288669  | 0.0042         | NM_002653       | PITX1     | 17.7219     | 0.0053         |
| hsa_circ_0079876 | 15.3805703  | 0.0005         | NM_018685       | ANLN      | 8.402977    | 0.0028         |
| hsa_circ_0079866 | 14.9940773  | 0.0002         | NM_018685       | ANLN      | 8.402977    | 0.0028         |
| hsa_circ_0001925 | 12.6093883  | 0.0005         | NM_012310       | KIF4A     | 8.248154    | 0.0008         |
| hsa_circ_0079872 | 12.5857654  | 0.0003         | NM_018685       | ANLN      | 8.402977    | 0.0028         |
| hsa_circ_0015977 | 12.3346156  | 0.0007         | NM_014176       | UBE2T     | 8.724626    | 0.0013         |
| hsa_circ_0079878 | 12.2509349  | 0.0014         | NM_018685       | ANLN      | 8.402977    | 0.0028         |
| hsa_circ_0079944 | 11.9347553  | 0.0030         | NM_002192       | INHBA     | 8.253856    | 0.0067         |
| hsa_circ_0090955 | 11.7859099  | 0.0019         | NM_012310       | KIF4A     | 8.248154    | 0.0008         |
| hsa_circ_0007051 | 11.2504408  | 0.0020         | NM_030919       | FAM83D    | 12.67857    | 0.0028         |
| hsa_circ_0015763 | 10.9603632  | 0.0022         | NM_018136       | ASPM      | 5.985841    | 0.0104         |
| hsa_circ_0012026 | 10.7941726  | 0.0143         | NM_001255       | CDC20     | 7.659971    | 0.0274         |
| hsa_circ_0015765 | 10.0719392  | 0.0007         | NM_018136       | ASPM      | 5.985841    | 0.0104         |
| hsa_circ_0017545 | -10.540751  | 0.0054         | NM_003739       | AKR1C3    | -8.21863    | 0.0073         |
| hsa_circ_0066033 | -10.749973  | 0.0003         | NM_020163       | SEMA3G    | -8.17348    | 0.0012         |
| hsa_circ_0074574 | -10.789315  | 0.0063         | NM_002084       | GPX3      | -12.2012    | 0.0193         |
| hsa_circ_0017544 | -12.174178  | 0.0073         | NM_003739       | AKR1C3    | -8.21863    | 0.0073         |
| hsa_circ_0017532 | -13.693181  | 0.0160         | NM_001353       | AKR1C1    | -13.4497    | 0.0118         |
| hsa_circ_0074576 | -14.143032  | 0.0088         | NM_002084       | GPX3      | -12.2012    | 0.0193         |
| hsa_circ_0017650 | -15.71248   | 0.0005         | NM_030569       | ITIH5     | -22.415     | 0.0011         |
| hsa_circ_0017546 | -16.153601  | 0.0097         | NM_003739       | AKR1C3    | -8.21863    | 0.0073         |
| hsa_circ_0017528 | -16.294634  | 0.0138         | NM_001353       | AKR1C1    | -13.4497    | 0.0118         |
| hsa_circ_0017538 | -18.242858  | 0.0217         | NM_001353       | AKR1C1    | -13.4497    | 0.0118         |
| hsa_circ_0017535 | -19.83211   | 0.0158         | NM_001353       | AKR1C1    | -13.4497    | 0.0118         |
| hsa_circ_0017536 | -24.758651  | 0.0129         | NM_001353       | AKR1C1    | -13.4497    | 0.0118         |
| hsa_circ_0017537 | -26.490034  | 0.0143         | NM_001353       | AKR1C1    | -13.4497    | 0.0118         |
| hsa_circ_0019218 | -46.176021  | 0.0107         | NM_006744       | RBP4      | -52.1616    | 0.0039         |
| hsa_circ_0019217 | -68.617726  | 0.0057         | NM_006744       | RBP4      | -52.1616    | 0.0039         |
